# Supplementary material
Source: PubMed Central journal article supplement (PMC3018285)
Supplement: NIHMS219274-supplement-02.pdf [file NIHMS219274-supplement-02.pdf]

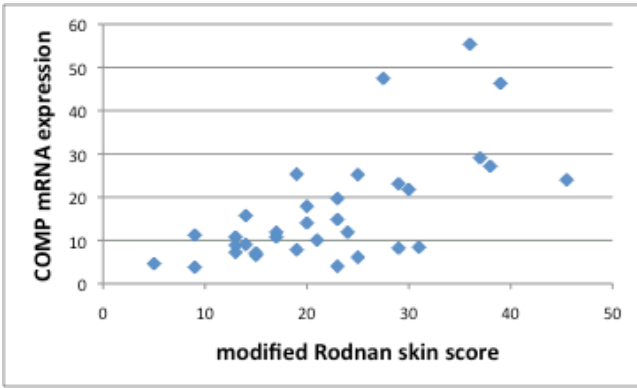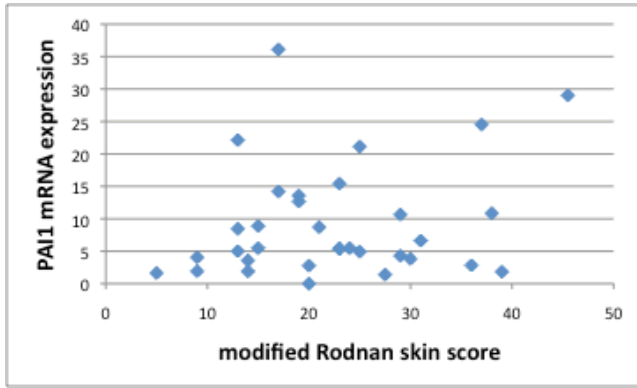

a  
A: Lesional Skin

b

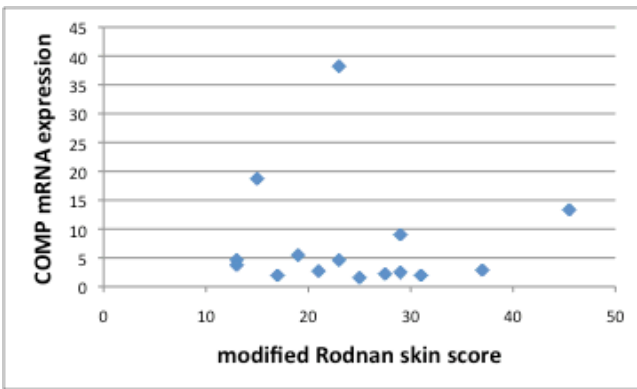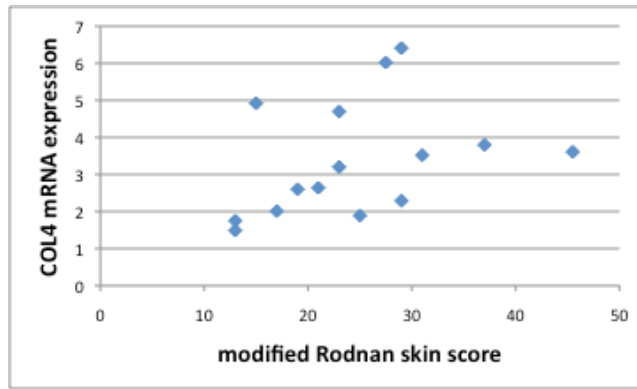

a

b

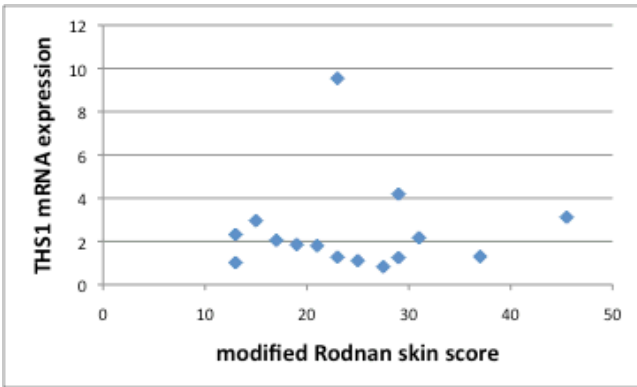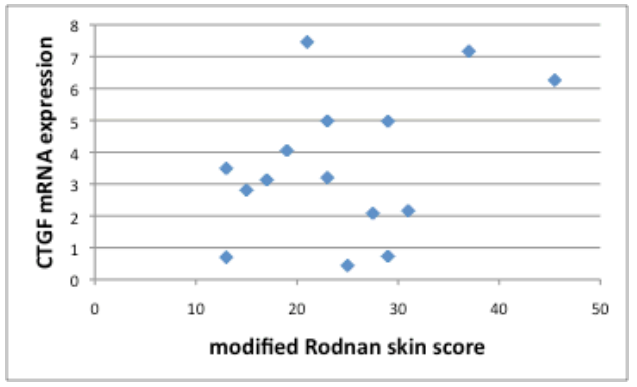

c  
d

B: Non-lesional Skin

Figure 1 (supplemental). Correlations of mRNA expression in lesional, panel A (COMP and PAI1) or non-lesional, panel B (COMP, COL4, THS1 and CTGF) skin related to the mRSS in subjects with dcSSc (see also Table II).
